# Supplementary material for: Obesity is associated with senescence of mesenchymal stromal cells derived from bone marrow, subcutaneous and visceral fat of young mice
Source: publisher site journal article supplement (doi:10.18632/aging.103606), 2020-07-07
Supplement: Supplementary file [file aging-v12i13-103606-supplementary-material-SD2.pdf]

**Supplementary File 2**  
**Statistical analysis**

## ANOVA Figure 1A

ANOVA

| Cases    | Sum of Squares | df | Mean Square | F     | p     |
|----------|----------------|----|-------------|-------|-------|
| V1       | 21.66          | 1  | 21.66       | 1.958 | 0.234 |
| Residual | 44.24          | 4  | 11.06       |       |       |

Note. Type III Sum of Squares

### Post Hoc Tests

Post Hoc Comparisons

|        |       | Mean Difference | SE    | t     | ptukey |
|--------|-------|-----------------|-------|-------|--------|
| HFD 1w | ND 1w | 3.800           | 2.715 | 1.399 | 0.234  |

Post Hoc Comparisons

|        |       | Mean Difference | SE    | t     | ptukey   |
|--------|-------|-----------------|-------|-------|----------|
| HFD 2w | ND 2w | 8.867           | 2.122 | 4.179 | 0.014 ** |

Post Hoc Comparisons

|        |       | Mean Difference | SE    | t     | ptukey   |
|--------|-------|-----------------|-------|-------|----------|
| HFD 3w | ND 3w | 9.967           | 1.368 | 7.286 | 0.002 ** |

Post Hoc Comparisons

|        |       | Mean Difference | SE    | t     | ptukey   |
|--------|-------|-----------------|-------|-------|----------|
| HFD 4w | ND 4w | 10.00           | 1.365 | 7.326 | 0.002 ** |

Post Hoc Comparisons

|        |       | Mean Difference | SE    | t     | ptukey   |
|--------|-------|-----------------|-------|-------|----------|
| HFD 5w | ND 5w | 11.50           | 1.617 | 7.114 | 0.002 ** |

Post Hoc Comparisons

|        |       | Mean Difference | SE    | t     | ptukey   |
|--------|-------|-----------------|-------|-------|----------|
| HFD 6w | ND 6w | 13.07           | 1.619 | 8.071 | 0.001 ** |

Post Hoc Comparisons

|        |       | Mean Difference | SE    | t     | ptukey   |
|--------|-------|-----------------|-------|-------|----------|
| HFD 7w | ND 7w | 12.97           | 1.790 | 7.244 | 0.002 ** |

Post Hoc Comparisons

|        |       | Mean Difference | SE    | t     | ptukey     |
|--------|-------|-----------------|-------|-------|------------|
| HFD 8w | ND 8w | 13.93           | 1.384 | 10.07 | < .001 *** |

Post Hoc Comparisons

|        |       | Mean Difference | SE    | t     | ptukey     |
|--------|-------|-----------------|-------|-------|------------|
| HFD 9w | ND 9w | 12.73           | 0.784 | 16.24 | < .001 *** |

Post Hoc Comparisons

|         |        | Mean Difference | SE    | t     | ptukey     |
|---------|--------|-----------------|-------|-------|------------|
| HFD 10w | ND 10w | 13.50           | 1.552 | 8.696 | < .001 *** |

## ANOVA Figure 1B

ANOVA - Glucose

| Cases    | Sum of Squares | df | Mean Square | F     | p      |
|----------|----------------|----|-------------|-------|--------|
| V1       | 25090.7        | 1  | 25090.7     | 118.5 | < .001 |
| Residual | 846.7          | 4  | 211.7       |       |        |

Note. Type III Sum of Squares

### Post Hoc Tests

Post Hoc Comparisons - V1

|     |    | Mean Difference | SE    | t     | ptukey     |
|-----|----|-----------------|-------|-------|------------|
| HFD | ND | 129.3           | 11.88 | 10.89 | < .001 *** |

## ANOVA Figure 2A - BM

ANOVA - CCK-8

| Cases    | Sum of Squares | df | Mean Square | F     | p     |
|----------|----------------|----|-------------|-------|-------|
| ND;0     | 202.8          | 1  | 202.8       | 1.202 | 0.353 |
| Residual | 506.0          | 3  | 168.7       |       |       |

Note. Type III Sum of Squares

### Post Hoc Tests

Post Hoc Comparisons - ND

|        |       | Mean Difference | SE    | t      | ptukey |
|--------|-------|-----------------|-------|--------|--------|
| HFD24h | ND24h | -13.00          | 11.86 | -1.097 | 0.353  |

Post Hoc Comparisons - ND;

|        |       | Mean Difference | SE    | t     | ptukey |
|--------|-------|-----------------|-------|-------|--------|
| HFD48h | ND48h | 2.333           | 3.677 | 0.635 | 0.571  |

Post Hoc Comparisons - ND

|        |       | Mean Difference | SE    | t      | ptukey |
|--------|-------|-----------------|-------|--------|--------|
| HFD72h | ND72h | -8.333          | 3.361 | -2.479 | 0.089  |

Post Hoc Comparisons - ND;0 ▼

|        |       | Mean Difference | SE    | t      | ptukey   |
|--------|-------|-----------------|-------|--------|----------|
| HFD96h | ND96h | -30.33          | 4.238 | -7.157 | 0.006 ** |

## ANOVA Figure 2A sWAT

ANOVA – CCK-8

| Cases    | Sum of Squares | df | Mean Square | F     | p     |
|----------|----------------|----|-------------|-------|-------|
| ND;0     | 13.33          | 1  | 13.33       | 0.375 | 0.584 |
| Residual | 106.67         | 3  | 35.56       |       |       |

Note. Type III Sum of Squares

### Post Hoc Tests

Post Hoc Comparisons – ND

|         |        | Mean Difference | SE    | t     | ptukey |
|---------|--------|-----------------|-------|-------|--------|
| HFD,24h | ND,24h | 3.333           | 5.443 | 0.612 | 0.584  |

Post Hoc Comparisons – ND

|         |        | Mean Difference | SE    | t      | ptukey |
|---------|--------|-----------------|-------|--------|--------|
| HFD,48h | ND,48h | -6.167          | 5.557 | -1.110 | 0.348  |

Post Hoc Comparisons – ND

|         |        | Mean Difference | SE    | t     | ptukey |
|---------|--------|-----------------|-------|-------|--------|
| HFD,72h | ND,72h | 14.67           | 8.735 | 1.679 | 0.192  |

Post Hoc Comparisons – ND

|         |        | Mean Difference | SE    | t     | ptukey |
|---------|--------|-----------------|-------|-------|--------|
| HFD,96h | ND,96h | 0.017           | 0.026 | 0.651 | 0.551  |

## ANOVA Figura 2A vWAT

ANOVA - CCK-8

| Cases    | Sum of Squares | df | Mean Square | F     | p     |
|----------|----------------|----|-------------|-------|-------|
| V1       | 4.167e -4      | 1  | 4.167e -4   | 0.962 | 0.382 |
| Residual | 0.002          | 4  | 4.333e -4   |       |       |

Note. Type III Sum of Squares

### Post Hoc Tests

Post Hoc Comparisons - V1

|        |        | Mean Difference | SE    | t      | ptukey |
|--------|--------|-----------------|-------|--------|--------|
| HFD24h | ND 24h | -0.017          | 0.017 | -0.981 | 0.382  |

Post Hoc Comparisons - V1

|        |        | Mean Difference | SE    | t      | ptukey   |
|--------|--------|-----------------|-------|--------|----------|
| HFD48h | ND 48h | -0.053          | 0.011 | -5.060 | 0.007 ** |

Post Hoc Comparisons - V1

|        |       | Mean Difference | SE    | t      | ptukey   |
|--------|-------|-----------------|-------|--------|----------|
| HFD72h | ND72h | -0.037          | 0.012 | -2.940 | 0.042 ** |

Post Hoc Comparisons - V1

|        |       | Mean Difference | SE    | t      | ptukey   |
|--------|-------|-----------------|-------|--------|----------|
| HFD96h | ND96h | -0.317          | 0.040 | -7.862 | 0.001 ** |

## ANOVA Figure 2B - BM

ANOVA - cell cycle

| Cases    | Sum of Squares | df | Mean Square | F     | p     |
|----------|----------------|----|-------------|-------|-------|
| V1       | 214.8          | 1  | 214.80      | 3.708 | 0.126 |
| Residual | 231.7          | 4  | 57.93       |       |       |

Note. Type III Sum of Squares

### Post Hoc Tests

Post Hoc Comparisons -

|        |       | Mean Difference | SE    | t     | ptukey |
|--------|-------|-----------------|-------|-------|--------|
| HFD G1 | ND G1 | 11.97           | 6.215 | 1.926 | 0.126  |

Post Hoc Comparisons - V1 ▼

|       |      | Mean Difference | SE    | t      | ptukey   |
|-------|------|-----------------|-------|--------|----------|
| HFD S | ND S | -5.800          | 0.904 | -6.418 | 0.003 ** |

Post Hoc Comparisons - V1

|         |        | Mean Difference | SE    | t      | ptukey  |
|---------|--------|-----------------|-------|--------|---------|
| HFDG2/M | NDG2/M | -10.80          | 2.378 | -4.542 | 0.010 * |

## ANOVA Figure 2B - sWAT

ANOVA - cell cycle

| Cases    | Sum of Squares | df | Mean Square | F     | p     |
|----------|----------------|----|-------------|-------|-------|
| V1       | 0.144          | 1  | 0.144       | 0.006 | 0.942 |
| Residual | 97.745         | 4  | 24.436      |       |       |

Note. Type III Sum of Squares

### Post Hoc Tests

Post Hoc Comparisons

|        |       | Mean Difference | SE    | t      | ptukey |
|--------|-------|-----------------|-------|--------|--------|
| HFD G1 | ND G1 | -0.310          | 4.036 | -0.077 | 0.942  |

Post Hoc Comparisons

|       |      | Mean Difference | SE    | t      | ptukey |
|-------|------|-----------------|-------|--------|--------|
| HFD S | ND S | -0.500          | 0.572 | -0.875 | 0.431  |

Post Hoc Comparisons

|          |         | Mean Difference | SE    | t     | ptukey |
|----------|---------|-----------------|-------|-------|--------|
| HFD G2/M | ND G2/M | 1.600           | 1.678 | 0.953 | 0.394  |

## ANOVA Figure 2B - vWAT

ANOVA – cell cycle

| Cases    | Sum of Squares | df | Mean Square | F     | p     |
|----------|----------------|----|-------------|-------|-------|
| V1       | 10.94          | 1  | 10.94       | 0.280 | 0.625 |
| Residual | 156.34         | 4  | 39.09       |       |       |

Note. Type III Sum of Squares

### Post Hoc Tests

Post Hoc Comparisons

|        |       | Mean Difference | SE    | t     | ptukey |
|--------|-------|-----------------|-------|-------|--------|
| HFD G1 | ND G1 | 2.700           | 5.105 | 0.529 | 0.625  |

Post Hoc Comparisons

|       |     | Mean Difference | SE    | t      | ptukey |
|-------|-----|-----------------|-------|--------|--------|
| HFD S | NDS | -0.500          | 0.739 | -0.676 | 0.536  |

Post Hoc Comparisons

|         |        | Mean Difference | SE    | t      | ptukey |
|---------|--------|-----------------|-------|--------|--------|
| HFDG2/M | NDG2/M | -4.400          | 2.462 | -1.787 | 0.148  |

## ANOVA Figure 3A

ANOVA – Annexin

| Cases    | Sum of Squares | df | Mean Square | F     | p     |
|----------|----------------|----|-------------|-------|-------|
| V1       | 0.042          | 1  | 0.042       | 0.305 | 0.610 |
| Residual | 0.547          | 4  | 0.137       |       |       |

Note. Type III Sum of Squares

### Post Hoc Tests

Post Hoc Comparisons

|               |              | Mean Difference | SE    | t      | ptukey |
|---------------|--------------|-----------------|-------|--------|--------|
| <b>HFD BM</b> | <b>ND BM</b> | -0.167          | 0.302 | -0.552 | 0.610  |

Post Hoc Comparisons

|                 |                | Mean Difference | SE    | t     | ptukey |
|-----------------|----------------|-----------------|-------|-------|--------|
| <b>HFD sWAT</b> | <b>ND sWAT</b> | 0.667           | 0.397 | 1.678 | 0.169  |

Post Hoc Comparisons

|                 |                | Mean Difference | SE    | t     | ptukey |
|-----------------|----------------|-----------------|-------|-------|--------|
| <b>HFD vWAT</b> | <b>ND vWAT</b> | 2.833           | 1.175 | 2.411 | 0.073  |

## ANOVA Figure 3B

ANOVA - Beta Gal

| Cases    | Sum of Squares | df | Mean Square | F     | p      |
|----------|----------------|----|-------------|-------|--------|
| V1       | 45.375         | 1  | 45.375      | 109.3 | < .001 |
| Residual | 1.660          | 4  | 0.415       |       |        |

Note. Type III Sum of Squares

### Post Hoc Tests

Post Hoc Comparisons

|               |              | Mean Difference | SE    | t     | ptukey     |
|---------------|--------------|-----------------|-------|-------|------------|
| HFD <b>BM</b> | ND <b>BM</b> | 5.500           | 0.526 | 10.46 | < .001 *** |

Post Hoc Comparisons

|                 |                | Mean Difference | SE    | t     | ptukey   |
|-----------------|----------------|-----------------|-------|-------|----------|
| HFD <b>sWAT</b> | ND <b>sWAT</b> | 2.300           | 0.327 | 7.042 | 0.002 ** |

Post Hoc Comparisons

|                 |                | Mean Difference | SE    | t     | ptukey     |
|-----------------|----------------|-----------------|-------|-------|------------|
| HFD <b>wWAT</b> | ND <b>wWAT</b> | 5.500           | 0.526 | 10.46 | < .001 *** |

## ANOVA Figure 3C

ANOVA – DCF–DA

| Cases    | Sum of Squares | df | Mean Square | F     | p     |
|----------|----------------|----|-------------|-------|-------|
| V1       | 71.415         | 1  | 71.415      | 61.65 | 0.001 |
| Residual | 4.633          | 4  | 1.158       |       |       |

Note. Type III Sum of Squares

### Post Hoc Tests

Post Hoc Comparisons

|              |             | Mean Difference | SE    | t     | ptukey   |
|--------------|-------------|-----------------|-------|-------|----------|
| <b>HFDBM</b> | <b>NDBM</b> | 6.900           | 0.879 | 7.852 | 0.001 ** |

Post Hoc Comparisons

|                |               | Mean Difference | SE    | t     | ptukey |
|----------------|---------------|-----------------|-------|-------|--------|
| <b>HFDSWAT</b> | <b>NDSWAT</b> | 0.800           | 0.309 | 2.588 | 0.061  |

Post Hoc Comparisons

|                |               | Mean Difference | SE    | t     | ptukey     |
|----------------|---------------|-----------------|-------|-------|------------|
| <b>HFDSWAT</b> | <b>NDVWAT</b> | 4.333           | 0.464 | 9.333 | < .001 *** |

## ANOVA Figure 3D - BM

ANOVA - WB

| Cases    | Sum of Squares | df | Mean Square | F     | p     |
|----------|----------------|----|-------------|-------|-------|
| V1       | 252150         | 1  | 252150      | 2.865 | 0.166 |
| Residual | 352065         | 4  | 88016       |       |       |

Note. Type III Sum of Squares

### Post Hoc Tests ▼

Post Hoc Comparisons

|        |      | Mean Difference | SE    | t     | ptukey |
|--------|------|-----------------|-------|-------|--------|
| HFD Rb | NDRb | 410.0           | 242.2 | 1.693 | 0.166  |

Post Hoc Comparisons

|         |        | Mean Difference | SE    | t     | ptukey  |
|---------|--------|-----------------|-------|-------|---------|
| HFD p53 | ND p53 | 1078            | 313.5 | 3.437 | 0.041 ★ |

Post Hoc Comparisons

|         |        | Mean Difference | SE    | t     | ptukey |
|---------|--------|-----------------|-------|-------|--------|
| HFD p21 | ND p21 | 443.0           | 159.0 | 2.785 | 0.050  |

Post Hoc Comparisons

|         |        | Mean Difference | SE    | t     | ptukey  |
|---------|--------|-----------------|-------|-------|---------|
| HFD p16 | ND p16 | 261.7           | 65.69 | 3.983 | 0.016 ★ |

## ANOVA Figure 3D -sWAT

ANOVA - WB

| Cases    | Sum of Squares | df | Mean Square | F     | p     |
|----------|----------------|----|-------------|-------|-------|
| V1       | 36038          | 1  | 36038       | 2.567 | 0.184 |
| Residual | 56161          | 4  | 14040       |       |       |

Note. Type III Sum of Squares

### Post Hoc Tests

Post Hoc Comparisons

|               |              | Mean Difference | SE    | t     | ptukey |
|---------------|--------------|-----------------|-------|-------|--------|
| HFD <b>Rb</b> | NDR <b>b</b> | 155.0           | 96.75 | 1.602 | 0.184  |

Post Hoc Comparisons

|                |               | Mean Difference | SE    | t      | ptukey |
|----------------|---------------|-----------------|-------|--------|--------|
| HFD <b>p53</b> | ND <b>p53</b> | -85.33          | 151.4 | -0.564 | 0.603  |

Post Hoc Comparisons

|                |               | Mean Difference | SE    | t     | ptukey  |
|----------------|---------------|-----------------|-------|-------|---------|
| HFD <b>p21</b> | ND <b>p21</b> | 195.3           | 61.80 | 3.161 | 0.034 * |

Post Hoc Comparisons

|                |               | Mean Difference | SE    | t     | ptukey  |
|----------------|---------------|-----------------|-------|-------|---------|
| HFD <b>p16</b> | ND <b>p16</b> | 161.0           | 54.02 | 2.980 | 0.041 * |

## ANOVA Figure 3D - vWAT

ANOVA - WB

| Cases    | Sum of Squares | df | Mean Square | F     | p     |
|----------|----------------|----|-------------|-------|-------|
| V1       | 165668         | 1  | 165668      | 9.495 | 0.037 |
| Residual | 69789          | 4  | 17447       |       |       |

Note. Type III Sum of Squares

### Post Hoc Tests

Post Hoc Comparisons

|               |              | Mean Difference | SE    | t     | ptukey  |
|---------------|--------------|-----------------|-------|-------|---------|
| <b>HFD Rb</b> | <b>ND Rb</b> | 332.3           | 107.8 | 3.081 | 0.037 * |

Post Hoc Comparisons

|                |               | Mean Difference | SE    | t      | ptukey |
|----------------|---------------|-----------------|-------|--------|--------|
| <b>HFD p53</b> | <b>ND p53</b> | -29.33          | 331.6 | -0.088 | 0.934  |

Post Hoc Comparisons

|                |               | Mean Difference | SE    | t     | ptukey  |
|----------------|---------------|-----------------|-------|-------|---------|
| <b>HFD p21</b> | <b>ND p21</b> | 385.3           | 84.70 | 4.549 | 0.010 * |

Post Hoc Comparisons

|                |               | Mean Difference | SE    | t     | ptukey  |
|----------------|---------------|-----------------|-------|-------|---------|
| <b>HFD p16</b> | <b>ND p16</b> | 321.3           | 97.45 | 3.297 | 0.030 * |

## ANOVA Figure 4 - BM

ANOVA - H2AX

| Cases    | Sum of Squares | df | Mean Square | F     | p      |
|----------|----------------|----|-------------|-------|--------|
| V1       | 14.680         | 7  | 2.097       | 109.4 | < .001 |
| Residual | 0.307          | 16 | 0.019       |       |        |

Note. Type III Sum of Squares

### Post Hoc Tests

Post Hoc Comparisons

|         |         | Mean Difference | SE    | t          | Ptukey     |
|---------|---------|-----------------|-------|------------|------------|
| HFD 0h  | HFD 1h  | -0.800          | 0.113 | -7.077     | < .001 ### |
|         | HFD 48h | -0.033          | 0.113 | -0.295     | 1.000      |
|         | HFD 6h  | -2.300          | 0.113 | -20.347    | < .001 ### |
|         | ND 0h   | 0.233           | 0.113 | 2.064      | 0.474      |
|         | ND 1h   | -0.033          | 0.113 | -0.295     | 1.000      |
|         | ND 48h  | 0.133           | 0.113 | 1.180      | 0.927      |
|         | ND 6h   | -0.300          | 0.113 | -2.654     | 0.207      |
| HFD 1h  | HFD 48h | 0.767           | 0.113 | 6.782      | < .001     |
|         | HFD 6h  | -1.500          | 0.113 | -13.270    | < .001     |
|         | ND 0h   | 1.033           | 0.113 | 9.141      | < .001     |
|         | ND 1h   | 0.767           | 0.113 | 6.782      | < .001 *** |
|         | ND 48h  | 0.933           | 0.113 | 8.257      | < .001     |
|         | ND 6h   | 0.500           | 0.113 | 4.423      | 0.008      |
| HFD 48h | HFD 6h  | -2.267          | 0.113 | -20.052    | < .001     |
|         | ND 0h   | 0.267           | 0.113 | 2.359      | 0.323      |
|         | ND 1h   | -3.331e-16      | 0.113 | -2.946e-15 | 1.000      |
|         | ND 48h  | 0.167           | 0.113 | 1.474      | 0.810      |
|         | ND 6h   | -0.267          | 0.113 | -2.359     | 0.322      |
| HFD 6h  | ND 0h   | 2.533           | 0.113 | 22.411     | < .001     |
|         | ND 1h   | 2.267           | 0.113 | 20.052     | < .001     |
|         | ND 48h  | 2.433           | 0.113 | 21.527     | < .001     |
|         | ND 6h   | 2.000           | 0.113 | 17.693     | < .001 *** |
| ND 0h   | ND 1h   | -0.267          | 0.113 | -2.359     | 0.322      |
|         | ND 48h  | -0.100          | 0.113 | -0.885     | 0.983      |
|         | ND 6h   | -0.533          | 0.113 | -4.718     | 0.004 ##   |
| ND 1h   | ND 48h  | 0.167           | 0.113 | 1.474      | 0.810      |
|         | ND 6h   | -0.267          | 0.113 | -2.359     | 0.322      |
| ND 48h  | ND 6h   | -0.433          | 0.113 | -3.833     | 0.025      |

## ANOVA Figure 4 - sWAT

ANOVA – H2AX

| Cases    | Sum of Squares | df | Mean Square | F     | p      |
|----------|----------------|----|-------------|-------|--------|
| V1       | 80.385         | 7  | 11.484      | 357.9 | < .001 |
| Residual | 0.513          | 16 | 0.032       |       |        |

Note. Type III Sum of Squares

### Post Hoc Tests ▼

Post Hoc Comparisons – V1 ▼

|         |         | Mean Difference | SE    | t          | Ptukey            |
|---------|---------|-----------------|-------|------------|-------------------|
| HFD 0h  | HFD 1h  | -0.067          | 0.146 | -0.456     | 1.000             |
|         | HFD 48h | -3.700          | 0.146 | -25.299    | < .001 <b>###</b> |
|         | HFD 6h  | -3.667          | 0.146 | -25.071    | < .001 <b>###</b> |
|         | ND 0h   | 0.233           | 0.146 | 1.595      | 0.746             |
|         | ND 1h   | 0.233           | 0.146 | 1.595      | 0.747             |
|         | ND 48h  | -3.467          | 0.146 | -23.704    | < .001            |
| HFD 1h  | ND 6h   | -3.367          | 0.146 | -23.020    | < .001            |
|         | HFD 48h | -3.633          | 0.146 | -24.843    | < .001            |
|         | HFD 6h  | -3.600          | 0.146 | -24.615    | < .001            |
|         | ND 0h   | 0.300           | 0.146 | 2.051      | 0.481             |
|         | ND 1h   | 0.300           | 0.146 | 2.051      | 0.481             |
|         | ND 48h  | -3.400          | 0.146 | -23.248    | < .001            |
| HFD 48h | ND 6h   | -3.300          | 0.146 | -22.564    | < .001            |
|         | HFD 6h  | 0.033           | 0.146 | 0.228      | 1.000             |
|         | ND 0h   | 3.933           | 0.146 | 26.895     | < .001            |
|         | ND 1h   | 3.933           | 0.146 | 26.895     | < .001            |
|         | ND 48h  | 0.233           | 0.146 | 1.595      | 0.746             |
|         | ND 6h   | 0.333           | 0.146 | 2.279      | 0.360             |
| HFD 6h  | ND 0h   | 3.900           | 0.146 | 26.667     | < .001            |
|         | ND 1h   | 3.900           | 0.146 | 26.667     | < .001            |
|         | ND 48h  | 0.200           | 0.146 | 1.368      | 0.859             |
|         | ND 6h   | 0.300           | 0.146 | 2.051      | 0.482             |
| ND 0h   | ND 1h   | 2.442e -15      | 0.146 | 1.670e -14 | 1.000             |
|         | ND 48h  | -3.700          | 0.146 | -25.299    | < .001 <b>###</b> |
|         | ND 6h   | -3.600          | 0.146 | -24.615    | < .001 <b>###</b> |
| ND 1h   | ND 48h  | -3.700          | 0.146 | -25.299    | < .001            |
|         | ND 6h   | -3.600          | 0.146 | -24.615    | < .001            |
| ND 48h  | ND 6h   | 0.100           | 0.146 | 0.684      | 0.996             |

## ANOVA Figure 4 -vWAT

ANOVA - H2AX

| Cases    | Sum of Squares | df | Mean Square | F     | p      |
|----------|----------------|----|-------------|-------|--------|
| V1       | 228.040        | 7  | 32.577      | 309.0 | < .001 |
| Residual | 1.687          | 16 | 0.105       |       |        |

Note. Type III Sum of Squares

### Post Hoc Tests

Post Hoc Comparisons - V1

|         |         | Mean Difference | SE    | t       | Ptukey    |
|---------|---------|-----------------|-------|---------|-----------|
| HFD 0h  | HFD 1h  | -0.200          | 0.265 | -0.754  | 0.993     |
|         | HFD 48h | -3.467          | 0.265 | -13.077 | < .001*** |
|         | HFD 6h  | -9.367          | 0.265 | -35.333 | < .001*** |
|         | ND 0h   | 0.033           | 0.265 | 0.126   | 1.000     |
|         | ND 1h   | -0.033          | 0.265 | -0.126  | 1.000     |
|         | ND 48h  | -1.533          | 0.265 | -5.784  | < .001    |
|         | ND 6h   | -4.267          | 0.265 | -16.095 | < .001    |
| HFD 1h  | HFD 48h | -3.267          | 0.265 | -12.322 | < .001    |
|         | HFD 6h  | -9.167          | 0.265 | -34.578 | < .001    |
|         | ND 0h   | 0.233           | 0.265 | 0.880   | 0.984     |
|         | ND 1h   | 0.167           | 0.265 | 0.629   | 0.998     |
|         | ND 48h  | -1.333          | 0.265 | -5.030  | 0.002     |
|         | ND 6h   | -4.067          | 0.265 | -15.340 | < .001    |
| HFD 48h | HFD 6h  | -5.900          | 0.265 | -22.256 | < .001    |
|         | ND 0h   | 3.500           | 0.265 | 13.203  | < .001    |
|         | ND 1h   | 3.433           | 0.265 | 12.951  | < .001    |
|         | ND 48h  | 1.933           | 0.265 | 7.293   | < .001*** |
|         | ND 6h   | -0.800          | 0.265 | -3.018  | 0.112     |
| HFD 6h  | ND 0h   | 9.400           | 0.265 | 35.458  | < .001    |
|         | ND 1h   | 9.333           | 0.265 | 35.207  | < .001    |
|         | ND 48h  | 7.833           | 0.265 | 29.549  | < .001    |
|         | ND 6h   | 5.100           | 0.265 | 19.238  | < .001*** |
| ND 0h   | ND 1h   | -0.067          | 0.265 | -0.251  | 1.000     |
|         | ND 48h  | -1.567          | 0.265 | -5.910  | < .001*** |
|         | ND 6h   | -4.300          | 0.265 | -16.220 | < .001*** |
| ND 1h   | ND 48h  | -1.500          | 0.265 | -5.658  | < .001    |
|         | ND 6h   | -4.233          | 0.265 | -15.969 | < .001    |
| ND 48h  | ND 6h   | -2.733          | 0.265 | -10.311 | < .001    |
